# Supplementary material
Source: PubMed Central journal article supplement (PMC2643555)
Supplement: supp_75_4_970__1.pdf [file supp_75_4_970__1.pdf]

**Supplementary Table1. PFGE determination of the I-CeuI restriction fragments size  
And genome size for the *L. sakei* natural population**

| Strains                | Number<br>of gels | <i>I-CeuI</i> restriction fragments size in kb |     |     |     |     |    |    | Total | SD   |
|------------------------|-------------------|------------------------------------------------|-----|-----|-----|-----|----|----|-------|------|
|                        |                   | C1                                             | C2  | C3  | C4  | C5  | C6 | C7 |       |      |
| 14                     | 4                 | 1191                                           | 359 | 183 | 147 | 127 | 32 | 6  | 2044  | ± 29 |
| 18                     | 4                 | 1195                                           | 362 | 181 | 147 | 128 | 34 | 6  | 2053  | ± 27 |
| 21                     | 7                 | 1191                                           | 359 | 194 | 143 | 118 | 33 | 6  | 2043  | ± 35 |
| 33                     | 6                 | 1222                                           | 397 | 178 | 142 | 100 | 58 | 6  | 2103  | ± 58 |
| 64                     | 10                | 1443                                           | 355 | 171 | 139 | 110 | 33 | 6  | 2256  | ± 30 |
| 72                     | 6                 | 1076                                           | 308 | 174 | 131 | 99  | 33 | 6  | 1826  | ± 21 |
| 112                    | 5                 | 1277                                           | 399 | 192 | 141 | 106 | 31 | 6  | 2152  | ± 35 |
| 134                    | 4                 | 1226                                           | 310 | 186 | 134 | 134 | 30 | 6  | 2026  | ± 23 |
| 156                    | 4                 | 1309                                           | 346 | 221 | 165 | 123 | 36 | 6  | 2205  | ± 41 |
| 195                    | 3                 | 1224                                           | 328 | 191 | 144 | 114 | 33 | 6  | 2039  | ± 16 |
| 205                    | 5                 | 1063                                           | 326 | 179 | 130 | 97  | 30 | -  | 1825  | ± 17 |
| 300                    | 4                 | 1136                                           | 333 | 186 | 143 | 101 | 35 | -  | 1934  | ± 28 |
| 331                    | 3                 | 1347                                           | 364 | 200 | 147 | 111 | 34 | 6  | 2208  | ± 30 |
| 332                    | 7                 | 1316                                           | 353 | 197 | 153 | 130 | 32 | 6  | 2186  | ± 33 |
| 495                    | 5                 | 1072                                           | 350 | 191 | 136 | 99  | 32 | 6  | 1887  | ± 39 |
| 504                    | 3                 | 1080                                           | 317 | 173 | 131 | 96  | 35 | 6  | 1838  | ± 23 |
| 710                    | 3                 | 1351                                           | 366 | 212 | 152 | 120 | 37 | 6  | 2244  | ± 74 |
| 741                    | 6                 | 1349                                           | 350 | 197 | 142 | 110 | 32 | -  | 2180  | ± 30 |
| 160K                   | 6                 | 1087                                           | 341 | 184 | 138 | 105 | 31 | 6  | 1890  | ± 33 |
| 23K                    | 24                | 1091                                           | 324 | 187 | 139 | 105 | 33 | 6  | 1885  | ± 29 |
| AGR46                  | 4                 | 1114                                           | 331 | 175 | 131 | 95  | 32 | 6  | 1884  | ± 37 |
| AGR48                  | 4                 | 1186                                           | 323 | 171 | 129 | 97  | 31 | 6  | 1943  | ± 36 |
| AGR51                  | 4                 | 1282                                           | 320 | 177 | 132 | 92  | 29 | 6  | 2038  | ± 29 |
| AGR53                  | 4                 | 1338                                           | 336 | 176 | 132 | 96  | 33 | 6  | 2116  | ± 44 |
| ATCC15521 <sup>T</sup> | 6                 | 1079                                           | 395 | 174 | 139 | 107 | 31 | -  | 1925  | ± 36 |
| CIP105422 <sup>T</sup> | 4                 | 1242                                           | 376 | 181 | 139 | 101 | 33 | 6  | 2077  | ± 33 |
| CRL1467                | 5                 | 1162                                           | 362 | 172 | 137 | 92  | 33 | -  | 1958  | ± 49 |
| CTC014                 | 4                 | 1214                                           | 347 | 192 | 145 | 109 | 32 | -  | 2038  | ± 41 |
| CTC041                 | 4                 | 1187                                           | 344 | 195 | 140 | 105 | 35 | 6  | 2010  | ± 27 |
| CTC163                 | 5                 | 1451                                           | 379 | 192 | 142 | 100 | 32 | 6  | 2301  | ± 32 |
| CTC287                 | 4                 | 1142                                           | 313 | 171 | 129 | 96  | 27 | 6  | 1884  | ± 35 |
| CTC335                 | 4                 | 1106                                           | 377 | 182 | 144 | 104 | 34 | 6  | 1952  | ± 49 |
| CTC427                 | 4                 | 1074                                           | 312 | 170 | 130 | 96  | 27 | 6  | 1814  | ± 30 |
| CTC429                 | 4                 | 1299                                           | 353 | 195 | 141 | 112 | 34 | 6  | 2139  | ± 28 |
| CTC494                 | 4                 | 1097                                           | 305 | 181 | 136 | 102 | 30 | -  | 1851  | ± 29 |
| CTC6469                | 4                 | 1454                                           | 376 | 189 | 133 | 98  | 30 | -  | 2278  | ± 30 |
| CTC6626                | 3                 | 1099                                           | 345 | 171 | 131 | 88  | 28 | 6  | 1869  | ± 32 |
| JG3                    | 3                 | 1264                                           | 354 | 188 | 144 | 106 | 32 | 6  | 2094  | ± 24 |
| L110                   | 3                 | 1083                                           | 336 | 183 | 136 | 95  | 29 | -  | 1863  | ± 13 |
| Lb706                  | 4                 | 1294                                           | 325 | 185 | 138 | 104 | 29 | 6  | 2081  | ± 26 |
| LTH1764                | 3                 | 1289                                           | 364 | 191 | 146 | 112 | 35 | 6  | 2143  | ± 39 |
| LTH2070                | 6                 | 1291                                           | 378 | 193 | 142 | 107 | 34 | 6  | 2150  | ± 27 |
| LTH5588                | 3                 | 1096                                           | 352 | 184 | 138 | 101 | 31 | 6  | 1909  | ± 17 |
| LTH5589                | 5                 | 1267                                           | 375 | 195 | 147 | 120 | 32 | 6  | 2142  | ± 31 |
| LTH5590                | 3                 | 1089                                           | 348 | 190 | 142 | 108 | 32 | 6  | 1915  | ± 22 |
| LTH5728                | 3                 | 1259                                           | 391 | 195 | 144 | 119 | 33 | 6  | 2147  | ± 65 |
| LTH673                 | 3                 | 1274                                           | 339 | 188 | 140 | 113 | 31 | 6  | 2092  | ± 42 |
| LTH675                 | 5                 | 1331                                           | 370 | 189 | 141 | 106 | 38 | 6  | 2180  | ± 29 |

| <i>I-CeuI</i> restriction fragments size in kb |                |      |     |     |     |     |    |    |       |      |
|------------------------------------------------|----------------|------|-----|-----|-----|-----|----|----|-------|------|
| Strains                                        | Number of gels | C1   | C2  | C3  | C4  | C5  | C6 | C7 | Total | SD   |
| LTH677                                         | 4              | 1431 | 368 | 194 | 144 | 104 | 63 | 6  | 2309  | ± 79 |
| LV21                                           | 3              | 1103 | 300 | 183 | 133 | 98  | 25 | 6  | 1847  | ± 14 |
| LV34                                           | 3              | 1116 | 315 | 190 | 140 | 103 | 33 | 6  | 1903  | ± 42 |
| LV5                                            | 4              | 1152 | 348 | 162 | 129 | 92  | 27 | -  | 1911  | ± 27 |
| LV52                                           | 3              | 1305 | 340 | 202 | 153 | 121 | 35 | 6  | 2162  | ± 28 |
| LV59                                           | 3              | 1228 | 319 | 191 | 142 | 114 | 33 | -  | 2027  | ± 18 |
| LV92                                           | 3              | 1205 | 339 | 197 | 144 | 116 | 33 | 6  | 2040  | ± 52 |
| MF1048                                         | 4              | 1146 | 352 | 180 | 133 | 98  | 28 | 6  | 1942  | ± 12 |
| MF2088                                         | 4              | 1085 | 349 | 179 | 135 | 101 | 29 | 6  | 1884  | ± 15 |
| MF2089                                         | 4              | 1141 | 334 | 178 | 130 | 100 | 29 | 6  | 1917  | ± 32 |
| MF2090                                         | 4              | 1137 | 330 | 175 | 130 | 98  | 28 | 6  | 1904  | ± 40 |
| MF2091                                         | 4              | 1115 | 331 | 177 | 132 | 98  | 28 | -  | 1880  | ± 26 |
| MF2092                                         | 4              | 1289 | 347 | 167 | 130 | 95  | 26 | 6  | 2059  | ± 41 |
| SF770                                          | 5              | 1292 | 373 | 178 | 140 | 104 | 32 | -  | 2120  | ± 26 |
| SF771                                          | 4              | 1262 | 371 | 178 | 138 | 103 | 32 | -  | 2083  | ± 37 |
| SF841                                          | 4              | 1269 | 337 | 174 | 140 | 102 | 30 | 6  | 2057  | ± 36 |
| SF842                                          | 6              | 1273 | 365 | 175 | 136 | 99  | 31 | -  | 2077  | ± 27 |
| SF843                                          | 4              | 1276 | 333 | 172 | 139 | 100 | 29 | 6  | 2053  | ± 34 |
| TISTR890                                       | 3              | 885  | 383 | 341 | 132 | 110 | 28 | -  | 1878  | ± 57 |
| TISTR911                                       | 4              | 1117 | 309 | 169 | 130 | 96  | 29 | 6  | 1856  | ± 19 |
| V553                                           | 4              | 1164 | 298 | 177 | 134 | 95  | 33 | 6  | 1905  | ± 34 |
| YME344                                         | 4              | 1204 | 317 | 176 | 133 | 95  | 34 | 6  | 1964  | ± 41 |
| YMH243                                         | 4              | 1181 | 346 | 175 | 133 | 107 | 33 | 6  | 1980  | ± 35 |
| YMW540                                         | 4              | 1234 | 316 | 193 | 140 | 102 | 32 | 6  | 2022  | ± 40 |
| YMW557                                         | 4              | 1147 | 386 | 190 | 142 | 105 | 31 | 6  | 2006  | ± 39 |

Statistics summary :

|             |             |            |            |            |            |           |          |             |             |
|-------------|-------------|------------|------------|------------|------------|-----------|----------|-------------|-------------|
| Minimum     | 885         | 298        | 162        | 129        | 88         | 25        | -        | 1814        | ± 12        |
| Maximum     | 1454        | 399        | 341        | 165        | 134        | 63        | 6        | 2308        | ± 79        |
| <b>Mean</b> | <b>1206</b> | <b>346</b> | <b>186</b> | <b>139</b> | <b>105</b> | <b>32</b> | <b>6</b> | <b>2020</b> | <b>± 30</b> |
| 23K         | 1091        | 324        | 187        | 139        | 105        | 33        | 6        | 1885        | ± 29        |

**PFGE determination of the *I-CeuI* restriction fragments size and genome size for two *L. curvatus* strains**

| <i>I-CeuI</i> restriction fragments size in kb |                |      |     |     |     |    |    |    |       |      |
|------------------------------------------------|----------------|------|-----|-----|-----|----|----|----|-------|------|
| Strains                                        | Number of gels | C1   | C2  | C3  | C4  | C5 | C6 | C7 | Total | SD   |
| DSM20019                                       | 5              | 1352 | 374 | 181 | 144 | 77 | 39 | -  | 2167  | ± 59 |
| CTC424                                         | 9              | 1211 | 350 | 187 | 147 | 72 | 40 | -  | 2007  | ± 55 |
