# Supplementary material
Source: PubMed Central journal article supplement (PMC2643555)
Supplement: supp_75_4_970__2.pdf [file supp_75_4_970__2.pdf]

**Supplementary Table2. List of oligonucleotides used in gene PCR detection**

| Gene name<br>Locus_tag    | Primer name | Sequence 5' to 3'         | PCR product<br>size in bp |
|---------------------------|-------------|---------------------------|---------------------------|
| LSA0088                   | OLS1683     | ATTACCAATGCGCGTTTTCT      | 1197                      |
|                           | OLS1684     | CCTTCTTCTTGAAGTCCAAT      |                           |
| LSA0118                   | OLS1782     | AAGAAAGTTATGAGCGAACAGT    | 1944                      |
|                           | OLS1783     | ACCAAAGCTTGTTTCGTATT      |                           |
| LSA0157                   | OLS678      | AAATTGGTGAACATAATGATGTAA  | 1019                      |
|                           | OLS1702     | TTTTACCTGTTAAAGTCGGTTTAG  |                           |
| LSA0165                   | OLS1733     | GGTGAGGCAGATTATCAAGG      | 722                       |
|                           | OLS1734     | AGCAGCATTGCTAGCTAAAA      |                           |
| LSA0172                   | OLS200B     | AATTTCTAGCTACAATATTCAGGG  | 1865                      |
|                           | OLS1810     | TATCACCTAAGTCAGCATCAAA    |                           |
| LSA0178                   | MAR9        | CTAGATAATACAAGAAGAGCGCTC  | 377                       |
|                           | MAR10       | ATCTATCTGACTCAACGTTTC     |                           |
| LSA0212                   | OLS1811     | TGGTGAAATTACAGCTAAAGATG   | 2576                      |
|                           | OLS1812     | ACGCCATAATTATCGGTGAC      |                           |
| LSA0216                   | OLS1876     | TTAAAGTTGATGGTGATGAT      | 1688                      |
|                           | OLS1877     | TGATTAAGTGTTGGTTTTGG      |                           |
| LSA0217                   | OLS1744     | GCGGATACTAGATTTATTGGTG    | 542                       |
|                           | OLS1745     | CACACCGATTGATTAAGGTC      |                           |
| LSA0218                   | OLS1746     | GAAGCCAATTTTAACGATGA      | 269                       |
|                           | OLS1747     | CGCTAATGCTTCTTTACGTT      |                           |
| LSA0219_b                 | OLS1748     | CAATTGCCATGTGTAACGTA      | 714                       |
|                           | OLS1749     | CCAATTGCAGCTAACAAGTAA     |                           |
| OLS0439                   | OLS1833     | ACTGATAAATCAGCGTCCAA      | 670                       |
|                           | OLS1834     | CTAAATATCGCAACGATTGTG     |                           |
| LSA0564_a to<br>LSA0564_c | OLS1794     | AGTTTTGGTAAAGGATTTATTGG   | 810                       |
|                           | OLS1795     | TCCATACCTAGAAAATCCTACAAT  |                           |
| LSA0565 to<br>LSA0566     | OLS1766     | GTGTTTCTTAAGAAAAGTAACGTGT | 367                       |
|                           | OLS1767     | AAATAAGCCTGATACGATTAATGA  |                           |
| LSA0567 to<br>LSA0569_b   | OLS1768     | GGCAATTAATGATCAAGAACTATT  | 1013                      |
|                           | OLS1769     | CATTGACTATCCAAGTACCCATT   |                           |
| LSA0572                   | OLS1707     | TGACATTTGTGATATTCGTGATA   | 904                       |
|                           | OLS1708     | TGTTCTTATCTTCAAGCCACTTAG  |                           |
| LSA0724 to<br>LSA0725     | OLS1784     | TGCATCAGCTTCAGTTATTTTTAT  | 1525                      |
|                           | OLS1785     | TGAAAACCTGAAACAATCGTTACA  |                           |

| Gene name<br>Locus_tag    | Primer name        | Sequence 5' to 3'                                   | PCR product<br>size in bp |
|---------------------------|--------------------|-----------------------------------------------------|---------------------------|
| LSA0727                   | OLS1786<br>OLS1787 | TCCTTGTTGGTGCATTATAAGT<br>CCTGAGTTTTACTCAAGAATCAA   | 702                       |
| LSA1006                   | OLS1739<br>OLS1740 | GGTGTTCCTGCATTTATTGGTG<br>TACCGACAATTGGAGACCAT      | 878                       |
| LSA1182/1183              | OLS1760<br>OLS1761 | GCGATTGCTGGTAACATAGG<br>AAAATCTTGCAACCGAACTC        | 1848                      |
| LSA1509                   | OLS1790<br>OLS1791 | TTTTTATTGATGTTTATTAG<br>GTTTAAGTTTATGGTGATTT        | 343                       |
| LSA1510_a to<br>LSA1510_c | OLS1792<br>OLS1793 | TTATTAATTTGTTATAAATT<br>AATTTTAGTGATTGTTGAATA       | 1251                      |
| LSA1510_d to<br>LSA1510_f | OLS1798<br>OLS1799 | AATAGAATTTAATTGGTTTTTTT<br>ATAGAGGTTTTTGGGAATGAA    | 2238                      |
| LSA1510_g                 | OLS1796<br>OLS1797 | TATTTTGTTTTTAGTTTTTGT<br>TTGGTATTAGTGTTAATTTA       | 1774                      |
| LSA1512 to<br>LSA1513     | OLS1772<br>OLS1777 | GTTTTTATTTTTAATTGTTTT<br>AAATAGTGAAGATGGTTTAT       | 1533                      |
| LSA1572                   | OLS1800<br>OLS1801 | TTTTATTAATTGATTTTGTTT<br>TTGATAATTAAGTATTGGTA       | 722                       |
| LSA1579 to<br>LSA1580     | OLS1804<br>OLS1805 | TGTAATTAATGTAATATATTTG<br>GTGTATTGTGTATATGTTATTG    | 2048                      |
| LSA1581                   | OLS1806<br>OLS1807 | TGTTTTATTAGTTAATAGTT<br>GGATAGTTATTTTTTTGGTG        | 1689                      |
| LSA1584 to<br>LSA1585     | OLS1808<br>OLS1809 | ATTAGTGGTAATATTATATA<br>GTAAAGGTATTATTAGATTAAT      | 2168                      |
| LSA1640                   | OLS1721<br>OLS1722 | AATTTTTTTTAATTATTGTATATA<br>TGTTTATGTTAATGGTTTTTTAG | 660                       |
| LSA1641                   | OLS1723<br>OLS1724 | TAATTTAATTTTAGAGTAGTGAT<br>TTATATAGTTTATTTATTATGG   | 520                       |
| LSA1642                   | OLS1725<br>OLS1850 | TGAAATGTAATTAATAATAAA<br>TAGAATAAGTATTTTTTATAGGA    | 1152                      |
| LSA1720                   | OLS1829<br>OLS1830 | AATTGTGTGTTATTTATTAAATT<br>TTTTATAATGATGGTATATATTGA | 1673                      |
| LSA1724                   | MAR23<br>MAR24     | GCGGAGCAACACGAAATTTTA<br>GCCAATCTGATATAACACATC      | 347                       |
| LSA1730                   | OLS533<br>OLS1813  | TGTAAATGAGTTTTGAAAGATG<br>TGGTTAAGGATAATGTTAAGATA   | 1202                      |

| Gene name<br>Locus_tag | Primer name | Sequence 5' to 3'         | PCR product<br>size in bp |
|------------------------|-------------|---------------------------|---------------------------|
| LSA1731                | OLS1814     | TTAATTTATTTTGAATTTGT      | 1682                      |
|                        | OLS1815     | TAATGATGATGTAATAATTG      |                           |
| LSA1809                | OLS1826     | TATTAATTTTTTTTAGTAATATT   | 1226                      |
|                        | OLS1674     | TAATGATAAGTTTTGTGAATTAGT  |                           |
| LSA1874                | MAR25       | ACAGCCGTTGATAGTTGG        | 587                       |
|                        | MAR26       | GTGACCGTTCATTCCGGA        |                           |
| <i>SspT</i>            | VAR13       | CGAGCTTTAGCGATGATTCTT     | 550                       |
|                        | VAR14       | TGCATGTTATTTGGGATATAGG    |                           |
| <i>SspA to spiA</i>    | VAR11       | AACAGCAATTACAGGTGGAA      | 500                       |
|                        | VAR12       | CAATTTATCTTCTTGAAAATCGG   |                           |
| FGP21-0001             | OLS1878     | ATGAACTATCGATGAGTTGGCAAG  | 200                       |
|                        | OLS1879     | ATATCACCTTCTTGTAATTCTAAA  |                           |
| <i>DrsB</i>            | VAR1        | CGCGAATAATATCCTGCAATA     | 1147                      |
|                        | VAR2        | TAATGTTTAGCAGGTCGGCA      |                           |
| FGP332-0001            | HHS1        | GGCGCAATCGATAAGGTT        | 250                       |
|                        | HSS2        | CCGTCATCATCTTGGTGC        |                           |
| FGP332-0002            | HSS5        | GTGGCACTGCCATGAAAT        | 300                       |
|                        | HSS6        | GCGGTCTATGCGGATATT        |                           |
| FGP332-0003            | HSS9        | TGCCAACTCAACAAGCAA        | 350                       |
|                        | HSS10       | CCCTGTGCGAGTGGTAAA        |                           |
| FGP332-0005            | VAR3        | CGCCATATAGATGATTAGCCA     | 850                       |
|                        | VAR4        | CATGTATGGCGGAACTTGTAT     |                           |
| FGP332-0006            | VAR5        | AGGTGCGAGTAAGGACTGCCA     | 403                       |
|                        | VAR6        | CGTTTTGAACATCTTCATAAGG    |                           |
| <i>LacC</i>            | VAR7        | AGAACAATCTCCTGTTAGTCCA    | 755                       |
|                        | VAR8        | CAAAGATTTGCGTTTTCTGTTC    |                           |
| <i>LacG</i>            | VAR9        | CGTATTTTCCCAACGGGTTA      | 1100                      |
|                        | VAR10       | AGGATAGCGTTCTTGCCTGT      |                           |
| FGP332-0007            | HSS11       | ACAGCTTATACTGATGGCACA     | 406                       |
|                        | HSS12       | TGTTGTGCACTGAAGACAAT      |                           |
| FGP332-0008            | HSS17       | GATGACGCCACTAACTGTTTA     | 465                       |
|                        | HSS18       | GTCAAGGAGGCGATTAGAA       |                           |
| FGP332-0009            | HSS23       | CCACGTTGGTCAACCG          | 135                       |
|                        | HSS24       | TTGACCTTGTTTTCTGGTT       |                           |
| FGP332-0010            | HSS25       | TCAGGAATTAGATGAATATGTGATT | 767                       |
|                        | HSS26       | TCTTCAACAACCATCTGTAAATC   |                           |

| Gene name   |             |                          | PCR product |
|-------------|-------------|--------------------------|-------------|
| Locus_tag   | Primer name | Sequence 5' to 3'        | size in bp  |
| FGP332-0011 | HSS29       | GCTAAATCTTGAAAGCTAACGG   | 521         |
|             | HSS30       | TTTATTAGAACAATTGACGACCTT |             |
| FGP332-0012 | HSS35       | AAGCAATCGTTGTCTCAAAG     | 562         |
|             | HSS36       | GCCGGCTGCTAATAATTG       |             |
| FGP332-0013 | HSS37       | CTTGAGATCGATCGGGTT       | 477         |
|             | HSS38       | GGACACCATGTGCAGGAT       |             |
| FGP332-0014 | HSS13       | AAAATGGTGGGGCAATATAC     | 740         |
|             | HSS14       | GCATCAATTGCTACTTGATCG    |             |
| FGP332-0015 | HSS19       | TGAACAATACGCTGAAATGTG    | 270         |
|             | HSS20       | GCATTTTCATCACCCACAGTTA   |             |
